# Supplementary material
Source: HighWire-hosted journal article supplement (https://diabetes.diabetesjournals.org/content/suppl/2007/03/02/db06-1421)
Supplement: DB1421online1.pdf [file DB1421online1.pdf]

**Supplementary Table 1.** SNPs used for association analysis of *ARHGEF11* and flanking regions in the Amish Family Diabetes Study.

| SNP No | DbSNP ID   | NCBI Location | Gene Locus      | Location (cSNP Type) | Minor Allele Frequency | T2D vs. NGT <i>P</i> -value | DM/IGT vs. NGT <i>P</i> -value |
|--------|------------|---------------|-----------------|----------------------|------------------------|-----------------------------|--------------------------------|
| 1      | RS12742817 | 153400105     |                 | intergenic           | 0.21                   | 0.58                        | 0.88                           |
| 2      | RS3795727  | 153402523     | <i>HAPLN2</i>   | intron 1             | 0.20                   | 0.38                        | 0.71                           |
| 3      | RS12405992 | 153407437     | <i>HAPLN2</i>   | intron 3             | 0.21                   | 0.33                        | 0.62                           |
| 4      | RS10908510 | 153410481     |                 | intergenic           | 0.095                  | 0.69                        | 0.71                           |
| 5      | RS6662946  | 153413974     |                 | intergenic           | 0.25                   | 0.82                        | 0.87                           |
| 6      | RS1361745  | 153423723     | <i>BCAN</i>     | 5' flank             | 0.024                  | 0.88                        | 0.43                           |
| 7      | RS3795736  | 153426005     | <i>BCAN</i>     | intron 1             | 0.36                   | 0.20                        | 0.14                           |
| 8      | RS2365716  | 153428267     | <i>BCAN</i>     | intron 1             | 0.003                  | 0.24                        | 0.34                           |
| 9      | RS2277873  | 153431041     | <i>BCAN</i>     | intron 4             | 0.41                   | 0.14                        | 0.92                           |
| 10     | RS12065791 | 153434324     | <i>BCAN</i>     | exon 7 (L356S)       | 0.003                  | 0.74                        | 0.73                           |
| 11     | RS11264511 | 153437357     | <i>BCAN</i>     | intron 7             | 0.33                   | <b>0.033</b>                | 0.45                           |
| 12     | RS2236601  | 153442510     |                 | intergenic           | 0.004                  | 0.71                        | 0.82                           |
| 13     | RS4661210  | 153447712     |                 | intergenic           | 0.43                   | 0.15                        | 0.65                           |
| 14     | RS1046650  | 153452073     | <i>NES</i>      | exon 4 (3'UTR)       | 0.13                   | 0.20                        | 0.52                           |
| 15     | RS3748570  | 153453229     | <i>NES</i>      | exon 4 (L1275P)      | 0.45                   | 0.36                        | 0.82                           |
| 16     | RS3828043  | 153453576     | <i>NES</i>      | exon 4 (G1159G)      | 0.14                   | 0.16                        | 0.61                           |
| 17     | RS951781   | 153454610     | <i>NES</i>      | exon 4 (I815V)       | 0.45                   | 0.31                        | 0.81                           |
| 18     | RS4559494  | 153463096     |                 | intergenic           | 0.38                   | 0.26                        | 0.67                           |
| 19     | RS4384231  | 153473384     |                 | intergenic           | 0.19                   | 0.75                        | 0.86                           |
| 20     | RS11264527 | 153480472     |                 | intergenic           | 0.38                   | 0.14                        | 0.27                           |
| 21     | RS4661213  | 153483617     | <i>CRABP2</i>   | intron 2             | 0.002                  | 0.28                        | <b>0.017</b>                   |
| 22     | RS4457570  | 153486035     | <i>CRABP2</i>   | intron 1             | 0.47                   | 0.15                        | 0.10                           |
| 23     | RS3806412  | 153489626     | <i>CRABP2</i>   | 5' flank             | 0.47                   | 0.11                        | 0.17                           |
| 24     | RS11264529 | 153492418     |                 | intergenic           | 0.46                   | 0.24                        | 0.26                           |
| 25     | RS6427327  | 153501445     |                 | intergenic           | 0.39                   | 0.12                        | 0.057                          |
| 26     | RS3795737  | 153510129     | <i>FLJ12671</i> | exon 1 S130N         | 0.07                   | 1.00                        | 0.82                           |
| 27     | RS7550297  | 153513918     | <i>CGI-41</i>   | intron 1             | 0.003                  | 0.24                        | 0.33                           |
| 28     | RS4311877  | 153518666     | <i>CGI-41</i>   | exon 7 (L400V)       | 0.002                  | 0.31                        | 0.13                           |
| 29     | RS8658     | 153519632     | <i>CGI-41</i>   | exon 8 (3'UTR)       | 0.32                   | 0.67                        | 1.00                           |
| 30     | RS9842     | 153525276     | <i>HDGF</i>     | exon 6 (3'UTR)       | 0.038                  | 0.75                        | 0.66                           |
| 31     | RS11264535 | 153535497     | <i>HDGF</i>     | 5' flank             | 0.24                   | 0.38                        | 0.81                           |

|    |            |           |                 |                     |       |              |               |
|----|------------|-----------|-----------------|---------------------|-------|--------------|---------------|
| 32 | RS6657293  | 153541922 |                 | intergenic          | 0.32  | 0.055        | 0.94          |
| 33 | RS11264546 | 153556246 | <i>PRCC</i>     | intron 1            | 0.41  | 0.13         | 0.44          |
| 34 | RS1412310  | 153559681 | <i>PRCC</i>     | intron 1            | 0.38  | 0.33         | 0.38          |
| 35 | RS3765787  | 153567538 | <i>PRCC</i>     | intron 2            | 0.15  | 0.34         | 0.73          |
| 36 | RS2644615  | 153574691 | <i>PRCC</i>     | intron 4            | 0.14  | 0.40         | 0.72          |
| 37 | RS3765783  | 153579046 | <i>PRCC</i>     | intron 5            | 0.22  | 0.45         | 0.90          |
| 38 | RS928392   | 153583889 | <i>PRCC</i>     | 3' flank            | 0.14  | 0.40         | 0.72          |
| 39 | RS928391   | 153589790 | <i>SH2D2A</i>   | intron 8            | 0.22  | 0.48         | 0.95          |
| 40 | RS877097   | 153591195 | <i>SH2D2A</i>   | intron 7            | 0.43  | 0.16         | 0.61          |
| 41 | RS2768764  | 153600001 | <i>SH2D2A</i>   | 5' flank            | 0.19  | 0.75         | 0.67          |
| 42 | RS7549730  | 153605475 |                 | intergenic          | 0.046 | 0.59         | 0.18          |
| 43 | RS1888861  | 153611034 |                 | intergenic          | 0.19  | 0.77         | 0.67          |
| 44 | RS4661061  | 153615730 |                 | intergenic          | 0.16  | 0.61         | 0.79          |
| 45 | RS1998977  | 153617194 |                 | intergenic          | 0.18  | 0.59         | 0.94          |
| 46 | RS4661229  | 153622279 |                 | intergenic          | 0.39  | 0.27         | 0.39          |
| 47 | RS10908521 | 153626723 | <i>INSRR</i>    | intron 15           | 0.21  | 0.88         | 0.30          |
| 48 | RS3753213  | 153642659 | <i>INSRR</i>    | 5' flank            | 0.004 | 0.37         | 0.48          |
| 49 | RS1007210  | 153643608 | <i>INSRR</i>    | 5' flank            | 0.013 | 0.15         | <b>0.0021</b> |
| 50 | RS2274496  | 153647271 | <i>NTRK1</i>    | exon 2<br>(S89G)    | 0.005 | 0.24         | <b>0.026</b>  |
| 51 | RS1800879  | 153651214 | <i>NTRK1</i>    | intron 5            | 0.25  | 0.95         | 0.34          |
| 52 | RS6334     | 153659306 | <i>NTRK1</i>    | exon 13<br>(Q558Q)  | 0.31  | 0.20         | 0.66          |
| 53 | RS6337     | 153662068 | <i>NTRK1</i>    | exon 15<br>(A629A)  | 0.31  | 0.22         | 0.18          |
| 54 | RS2768759  | 153665536 | <i>FLJ00193</i> | 5' flank            | 0.29  | 0.29         | 0.13          |
| 55 | RS943551   | 153668570 | <i>FLJ00193</i> | intron 1            | 0.014 | <b>0.046</b> | 0.56          |
| 56 | RS6671171  | 153684391 | <i>FLJ00193</i> | intron 4            | 0.16  | 0.78         | 0.10          |
| 57 | RS1952294  | 153690530 | <i>FLJ00193</i> | exon 7<br>(P559S)   | 0.001 | 0.52         | 0.78          |
| 58 | RS3737224  | 153692653 | <i>FLJ00193</i> | exon 8<br>(P834P)   | 0.18  | 0.97         | 0.57          |
| 59 | RS822442   | 153696287 | <i>FLJ00193</i> | exon 16<br>(K1156N) | 0.14  | 0.53         | 0.16          |
| 60 | RS11264581 | 153696566 | <i>FLJ00193</i> | exon 17<br>(H1193R) | 0.19  | 0.37         | 0.88          |
| 61 | RS12137505 | 153696619 | <i>FLJ00193</i> | exon 17<br>(D1211N) | 0.35  | 0.24         | 0.88          |
| 62 | RS4661012  | 153698564 | <i>FLJ00193</i> | intron 30           | 0.29  | 0.70         | 0.34          |
| 63 | RS822436   | 153705467 | <i>FLJ32884</i> | intron 2            | 0.20  | 0.20         | <b>0.019</b>  |
| 64 | RS865239   | 153709237 | <i>FLJ32884</i> | intron 3            | 0.48  | 0.10         | 0.27          |
| 65 | RS822426   | 153711903 | <i>FLJ32884</i> | intron 4            | 0.18  | 0.19         | <b>0.017</b>  |
| 66 | RS11264584 | 153712361 | <i>FLJ32884</i> | intron 5            | 0.20  | 0.17         | <b>0.0093</b> |

|     |            |           |                 |                     |       |               |               |
|-----|------------|-----------|-----------------|---------------------|-------|---------------|---------------|
| 67  | RS822427   | 153712665 | <i>FLJ32884</i> | intron 6            | 0.20  | 0.12          | <b>0.0065</b> |
| 68  | RS822428   | 153713022 | <i>FLJ32884</i> | intron 6            | 0.004 | 0.91          | 0.87          |
| 69  | RS2768751  | 153714091 | <i>FLJ32884</i> | intron 7            | 0.004 | 0.31          | 0.36          |
| 70  | RS12119908 | 153715295 | <i>FLJ32884</i> | exon 15<br>(H269R)  | 0.11  | 0.39          | 0.14          |
| 71  | RS822430   | 153715332 | <i>FLJ32884</i> | exon 15<br>(T283T)  | 0.47  | <b>0.035</b>  | 0.23          |
| 72  | RS822431   | 153715354 | <i>FLJ32884</i> | exon 15<br>(A289S)  | 0.20  | 0.24          | <b>0.024</b>  |
| 73  | RS11264585 | 153715751 | <i>FLJ32884</i> | exon 16<br>(T353T)  | 0.005 | 0.87          | 0.85          |
| 74  | RS822432   | 153716216 | <i>FLJ32884</i> | 3' flank<br>exon 41 | 0.19  | 0.10          | <b>0.0044</b> |
| 75  | RS3187878  | 153717717 | <i>ARHGEF11</i> | (3'UTR)<br>exon 41  | 0.19  | 0.086         | <b>0.015</b>  |
| 76  | RS6676     | 153717891 | <i>ARHGEF11</i> | (3'UTR)             | 0.20  | 0.21          | <b>0.021</b>  |
| 77  | RS883232   | 153719523 | <i>ARHGEF11</i> | intron 40           | 0.28  | 0.36          | 0.59          |
| 78  | RS2275198  | 153719954 | <i>ARHGEF11</i> | intron 39           | 0.19  | 0.28          | <b>0.030</b>  |
| 79  | RS945508   | 153720154 | <i>ARHGEF11</i> | exon 39<br>(R1467H) | 0.47  | <b>0.037</b>  | 0.17          |
| 80  | RS868188   | 153720188 | <i>ARHGEF11</i> | exon 39<br>(G1456S) | 0.33  | 0.25          | 0.71          |
| 81  | RS3818807  | 153722376 | <i>ARHGEF11</i> | intron 37           | 0.20  | 0.22          | <b>0.023</b>  |
| 82  | RS2275199  | 153722768 | <i>ARHGEF11</i> | exon 36<br>(N1247N) | 0.20  | 0.15          | <b>0.0096</b> |
| 83  | RS2275200  | 153724452 | <i>ARHGEF11</i> | intron 34           | 0.24  | 0.85          | 0.14          |
| 84  | RS2275201  | 153728111 | <i>ARHGEF11</i> | intron 29           | 0.18  | 0.18          | <b>0.020</b>  |
| 85  | GEF11-1467 | 153729377 | <i>ARHGEF11</i> | intron 28           | 0.030 | 0.31          | 0.99          |
| 86  | RS12138039 | 153731210 | <i>ARHGEF11</i> | exon 23<br>(S649S)  | 0.076 | 0.43          | 0.90          |
| 87  | RS2275202  | 153734293 | <i>ARHGEF11</i> | intron 22           | 0.051 | 0.12          | <b>0.0051</b> |
| 88  | RS2275204  | 153738508 | <i>ARHGEF11</i> | intron 20           | 0.19  | 0.26          | <b>0.039</b>  |
| 89  | RS1572409  | 153741849 | <i>ARHGEF11</i> | intron 17           | 0.20  | 0.12          | <b>0.0063</b> |
| 90  | RS6667252  | 153743053 | <i>ARHGEF11</i> | intron 15           | 0.006 | 0.46          | 0.074         |
| 91  | RS1336150  | 153746686 | <i>ARHGEF11</i> | intron 11           | 0.33  | 0.34          | 0.47          |
| 92  | RS4661077  | 153747966 | <i>ARHGEF11</i> | intron 11           | 0.32  | 0.44          | 0.47          |
| 93  | RS6679776  | 153749355 | <i>ARHGEF11</i> | intron 11           | 0.20  | 0.33          | 0.063         |
| 94  | RS2275206  | 153752140 | <i>ARHGEF11</i> | intron 10           | 0.16  | 0.24          | 0.053         |
| 95  | RS1336149  | 153752248 | <i>ARHGEF11</i> | intron 9            | 0.38  | 0.54          | 0.68          |
| 96  | RS12136088 | 153754485 | <i>ARHGEF11</i> | intron 8            | 0.23  | <b>0.0020</b> | <b>0.0030</b> |
| 97  | RS1336147  | 153757272 | <i>ARHGEF11</i> | intron 8            | 0.24  | 0.087         | <b>0.0086</b> |
| 98  | RS1006168  | 153759971 | <i>ARHGEF11</i> | intron 6            | 0.24  | <b>0.028</b>  | <b>0.0095</b> |
| 99  | RS12141806 | 153761026 | <i>ARHGEF11</i> | intron 6            | 0.23  | <b>0.045</b>  | <b>0.0068</b> |
| 100 | RS1007604  | 153761953 | <i>ARHGEF11</i> | intron 5            | 0.23  | 0.080         | <b>0.0070</b> |

|     |              |           |                  |                   |       |               |               |
|-----|--------------|-----------|------------------|-------------------|-------|---------------|---------------|
| 101 | RS1572416    | 153765127 | <i>ARHGEF11</i>  | intron 3          | 0.24  | 0.084         | <b>0.0085</b> |
| 102 | RS6427339    | 153767340 | <i>ARHGEF11</i>  | intron 2          | 0.42  | <b>0.018</b>  | <b>0.0061</b> |
| 103 | RS6427340    | 153767457 | <i>ARHGEF11</i>  | intron 2          | 0.41  | <b>0.0048</b> | <b>0.0008</b> |
| 104 | RS7541702    | 153767506 | <i>ARHGEF11</i>  | intron 2          | 0.23  | 0.060         | <b>0.0090</b> |
| 105 | RS3737599    | 153769130 | <i>ARHGEF11</i>  | intron 1          | 0.18  | 0.38          | 0.73          |
| 106 | RS1572414    | 153776947 | <i>ARHGEF11</i>  | intron 1          | 0.24  | 0.084         | <b>0.0085</b> |
| 107 | RS884891     | 153782676 | <i>ARHGEF11</i>  | intron 1          | 0.24  | 0.087         | <b>0.0093</b> |
| 108 | RS822579     | 153788095 | <i>ARHGEF11</i>  | intron 1          | 0.50  | 0.29          | 0.45          |
| 109 | RS822581     | 153789298 | <i>ARHGEF11</i>  | intron 1          | 0.24  | 0.084         | <b>0.0085</b> |
| 110 | RS703152     | 153790978 | <i>ARHGEF11</i>  | intron 1          | 0.24  | <b>0.036</b>  | <b>0.0030</b> |
| 111 | RS1763911    | 153795341 | <i>ARHGEF11</i>  | intron 1          | 0.016 | 0.64          | 0.28          |
| 112 | RS1763908    | 153797112 | <i>ARHGEF11</i>  | intron 1          | 0.19  | 0.51          | 1.00          |
| 113 | RS822576     | 153804644 | <i>ARHGEF11</i>  | intron 1          | 0.47  | 0.057         | <b>0.014</b>  |
| 114 | RS1336146    | 153815516 | <i>ARHGEF11</i>  | intron 1          | 0.47  | 0.063         | <b>0.015</b>  |
| 115 | RS822570     | 153820575 | <i>ARHGEF11</i>  | intron 1          | 0.47  | 0.057         | <b>0.015</b>  |
| 116 | RS11264605   | 153824398 | <i>ARHGEF11</i>  | intron 1          | 0.20  | 0.42          | 0.99          |
| 117 | RS822572     | 153827775 | <i>ARHGEF11</i>  | exon 1<br>(5'UTR) | 0.47  | 0.076         | <b>0.016</b>  |
| 118 | GEF11-113332 | 153828037 | <i>ARHGEF11</i>  | exon 1<br>(5'UTR) | 0.48  | 0.26          | 0.38          |
| 119 | RS3806422    | 153828099 | <i>ARHGEF11</i>  | exon 1<br>(5'UTR) | 0.19  | 0.38          | 0.84          |
| 120 | RS861086     | 153829497 | <i>ARHGEF11</i>  | 5'flank           | 0.007 | 0.11          | <b>0.011</b>  |
| 121 | RS822585     | 153830278 | <i>ARHGEF11</i>  | 5'flank           | 0.41  | 0.013         | <b>0.014</b>  |
| 122 | RS703111     | 153832348 | <i>ARHGEF11</i>  | 5'flank           | 0.19  | 0.52          | 1.00          |
| 123 | RS822586     | 153833101 | <i>ARHGEF11</i>  | 5'flank           | 0.002 | 0.63          | 0.81          |
| 124 | RS12045761   | 153836434 | <i>ARHGEF11</i>  | 5'flank           | 0.19  | 0.52          | 0.85          |
| 125 | RS866605     | 153842063 | <i>ARHGEF11</i>  | 5'flank           | 0.035 | 0.80          | 0.55          |
| 126 | RS1750810    | 153850563 | <i>ARHGEF11</i>  | 5'flank           | 0.46  | 0.062         | <b>0.012</b>  |
| 127 | RS2068299    | 153861949 |                  | intergenic        | 0.019 | 0.24          | 0.094         |
| 128 | RS4661014    | 153867810 |                  | intergenic        | 0.47  | 0.35          | 0.64          |
| 129 | RS6677868    | 153874293 |                  | intergenic        | 0.47  | 0.34          | 0.63          |
| 130 | RS1467662    | 153878247 | <i>LOC440695</i> | intron 4          | 0.20  | 0.098         | 0.14          |
| 131 | RS983227     | 153883864 | <i>LOC440695</i> | 5' flank          | 0.001 | 0.64          | 0.31          |
| 132 | RS7521028    | 153890378 |                  | intergenic        | 0.10  | 0.14          | 0.98          |
| 133 | RS1176529    | 153892203 |                  | intergenic        | 0.33  | 0.22          | 0.23          |
| 134 | RS946577     | 153899204 |                  | intergenic        | 0.43  | 0.24          | 0.059         |
| 135 | RS998842     | 153915526 | INTRGEN          | intergenic        | 0.20  | 0.25          | 0.82          |
| 136 | RS3737269    | 153918863 | <i>ETV3</i>      | intron 1          | 0.034 | 0.93          | 0.80          |
| 137 | RS6427353    | 153922697 | <i>ETV3</i>      | 5'flank           | 0.20  | 0.43          | 0.69          |

|     |            |           |            |       |       |      |
|-----|------------|-----------|------------|-------|-------|------|
| 138 | RS6679296  | 153930700 | intergenic | 0.055 | 0.97  | 0.37 |
| 139 | RS992162   | 153936203 | intergenic | 0.18  | 0.052 | 0.18 |
| 140 | RS10908531 | 153941778 | intergenic | 0.19  | 0.59  | 0.98 |
| 141 | RS1176555  | 153949614 | intergenic | 0.19  | 0.58  | 0.96 |
| 142 | RS12038802 | 153954410 | intergenic | 0.32  | 0.31  | 0.36 |
| 143 | RS883328   | 153960182 | intergenic | 0.32  | 0.30  | 0.37 |
| 144 | RS1970354  | 153964439 | intergenic | 0.40  | 0.84  | 0.56 |
| 145 | RS4661018  | 153984335 | intergenic | 0.062 | 0.65  | 0.12 |
| 146 | RS11264633 | 153993955 | intergenic | 0.004 | 0.074 | 0.26 |
| 147 | RS7511847  | 154000509 | intergenic | 0.059 | 0.72  | 0.16 |

---

NCBI location is based on Build 35.1.

SNPs without RS numbers were identified by direct sequencing and were not in dbSNP  
Allele frequencies based upon all AFDS subjects genotyped.
