# Supplementary material
Source: HighWire-hosted journal article supplement (https://diabetes.diabetesjournals.org/content/suppl/2007/03/02/db06-1421)

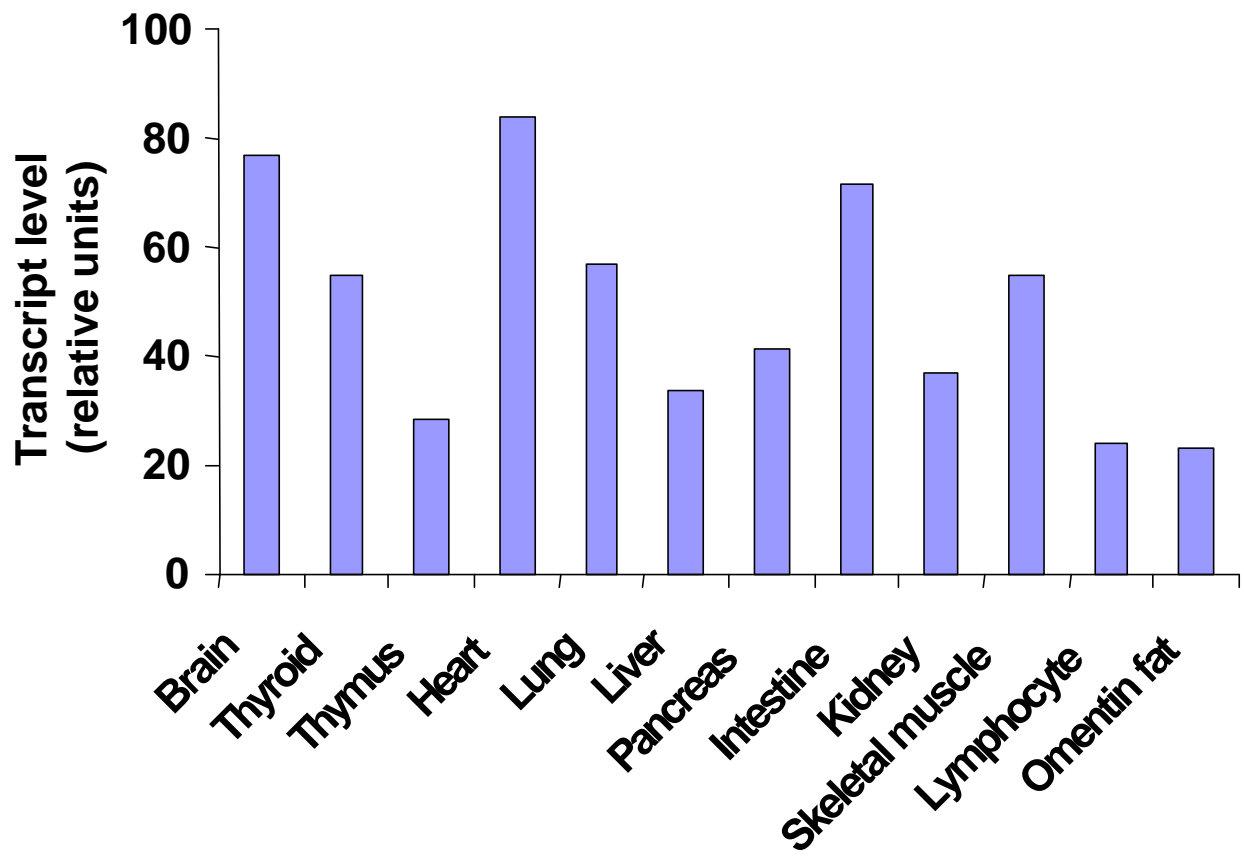

Supplemental Figure 1

Supplement: 1421online1.pdf [file 1421online1.pdf]
